# Supplementary material
Source: Research Square preprint supplement (doi:10.21203/rs.3.rs-9474853/v1)
Supplement: Supplementary file 1 [file eb8ec3d3a67386d794052bc9.pdf]

A

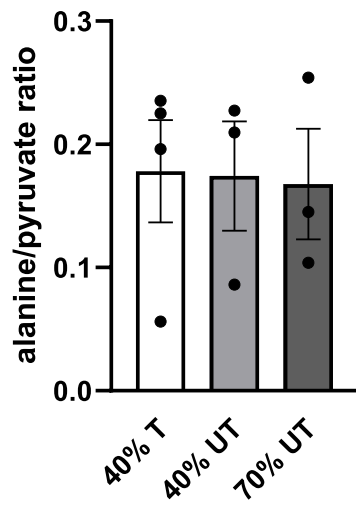

B

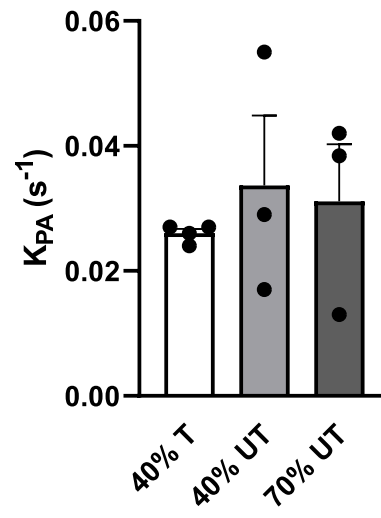

Supplementary Figure 1

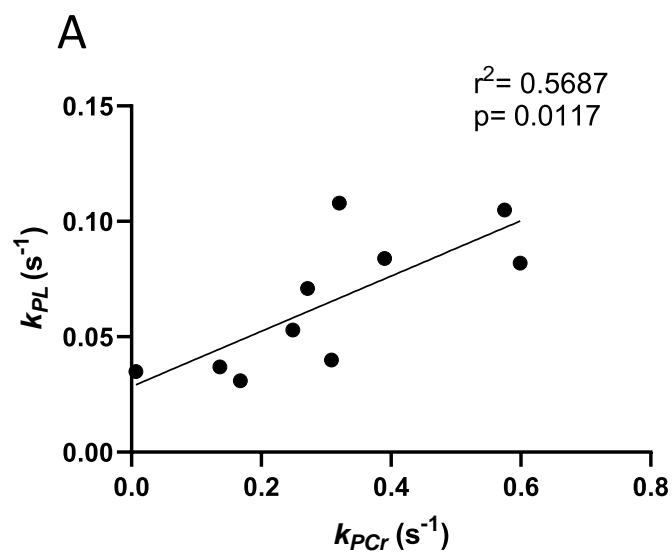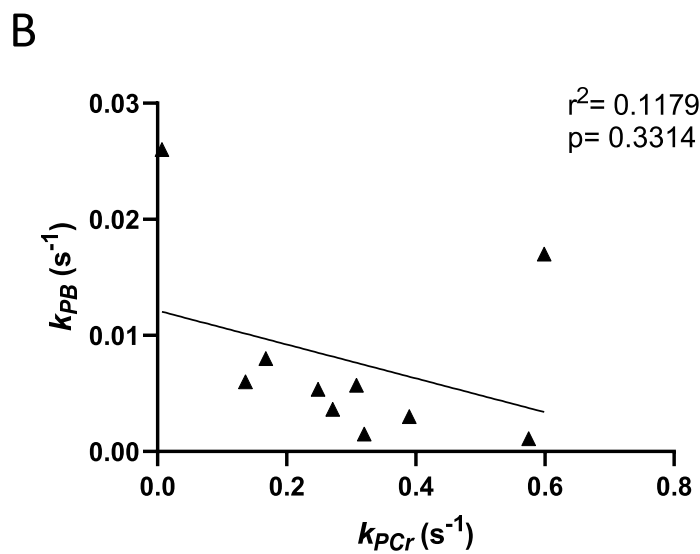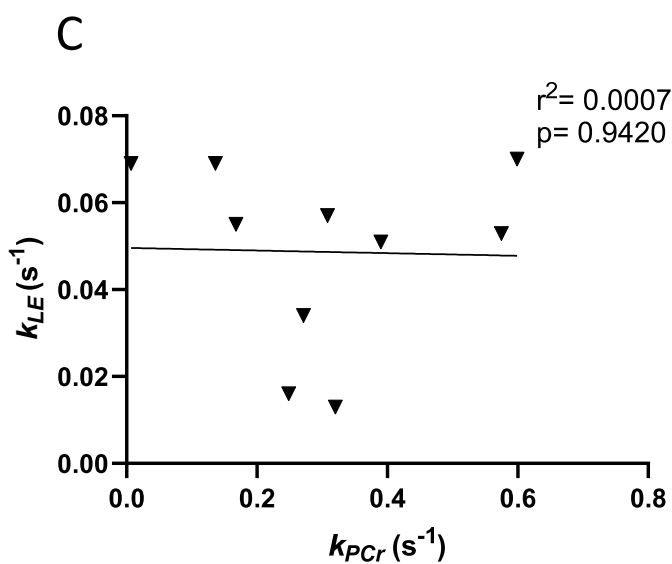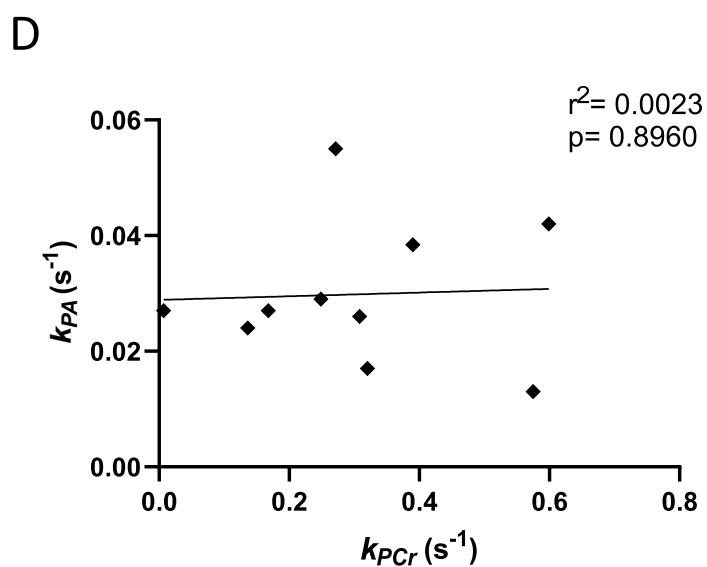

Supplementary Figure 2

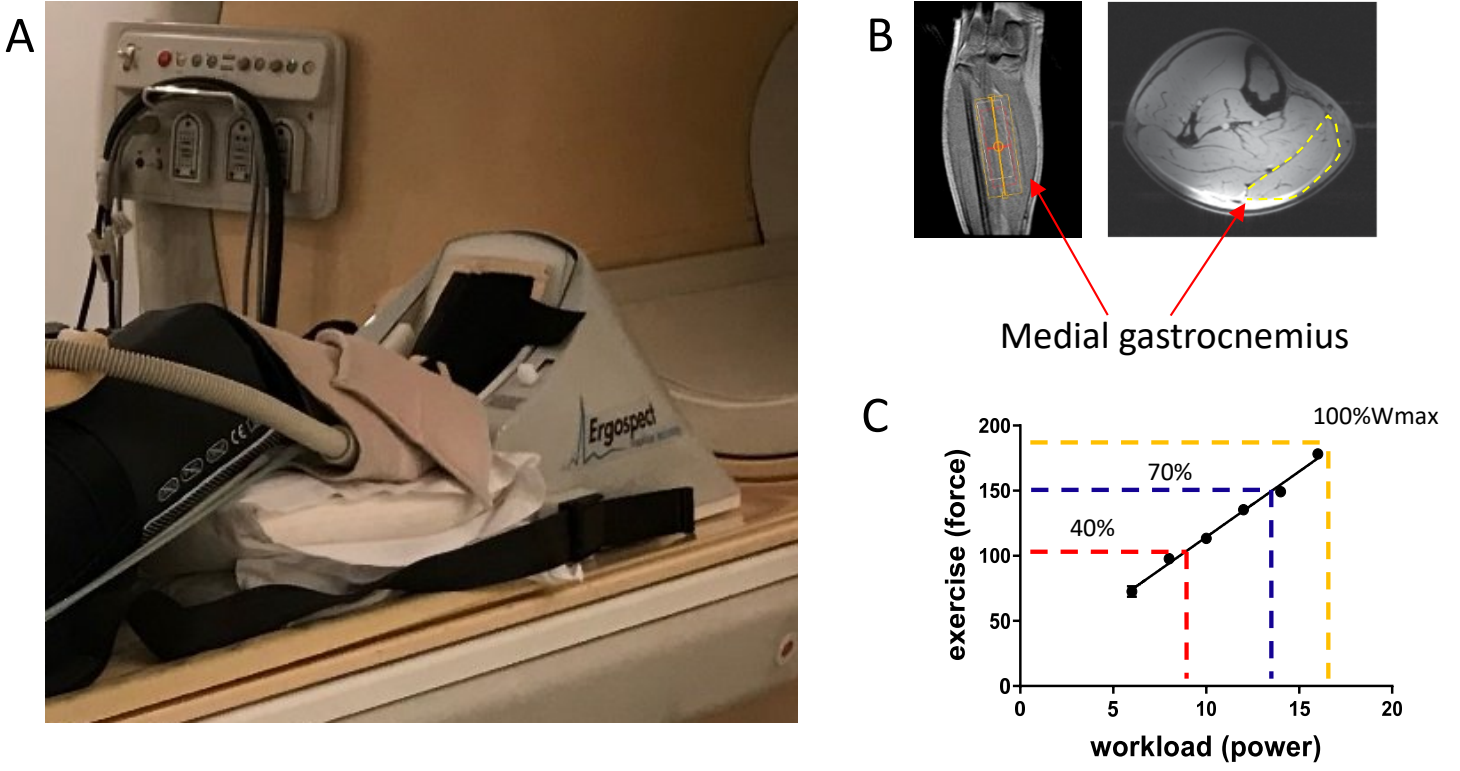

Supplementary Figure 3

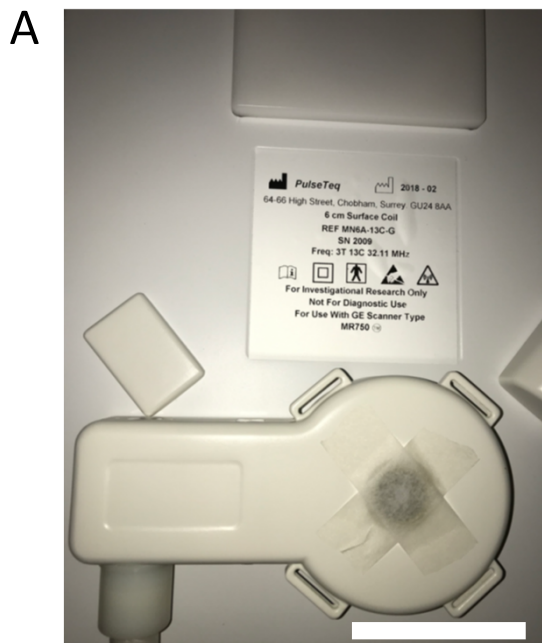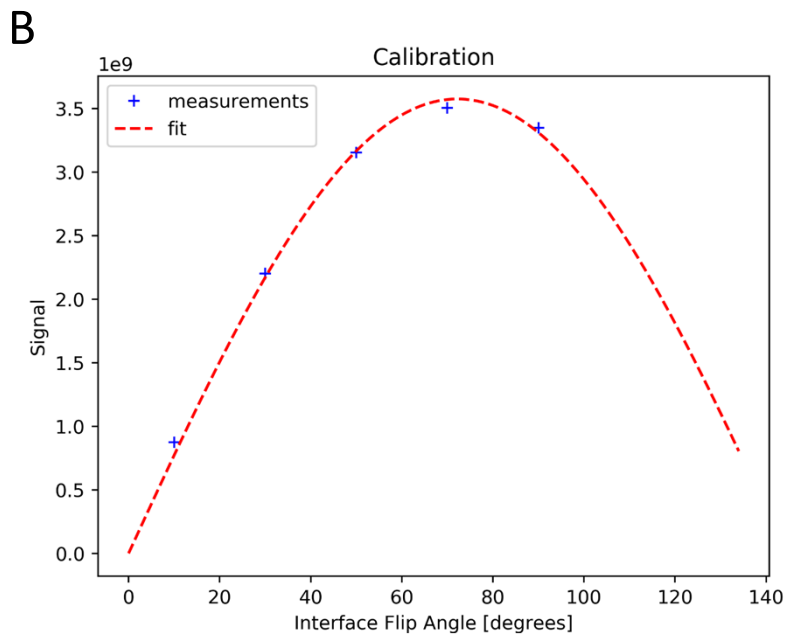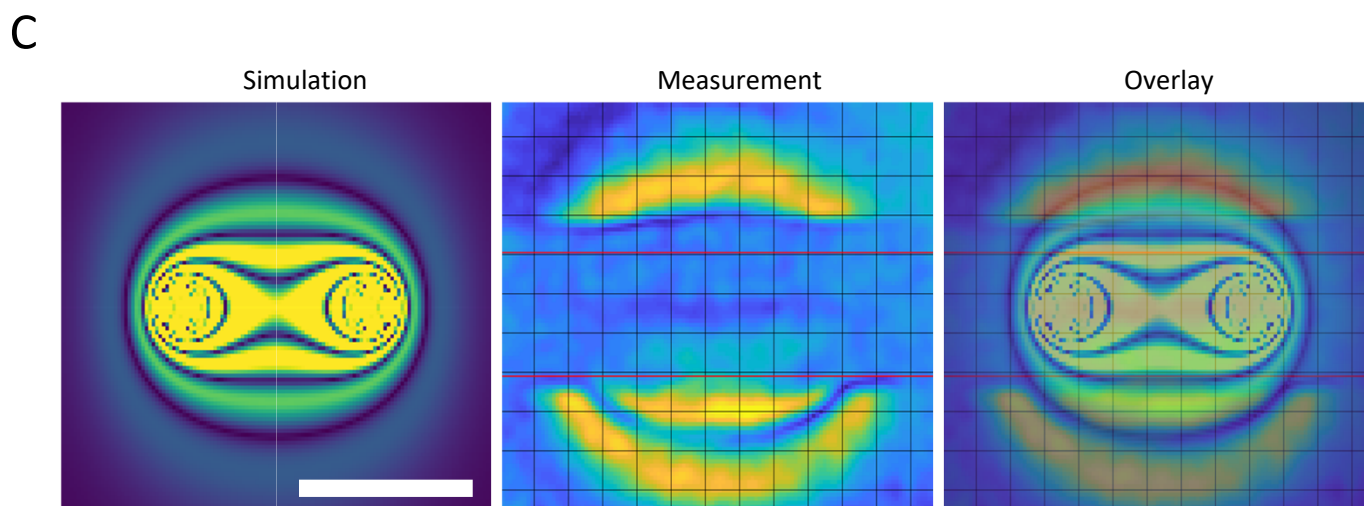

Supplementary Figure 4

A

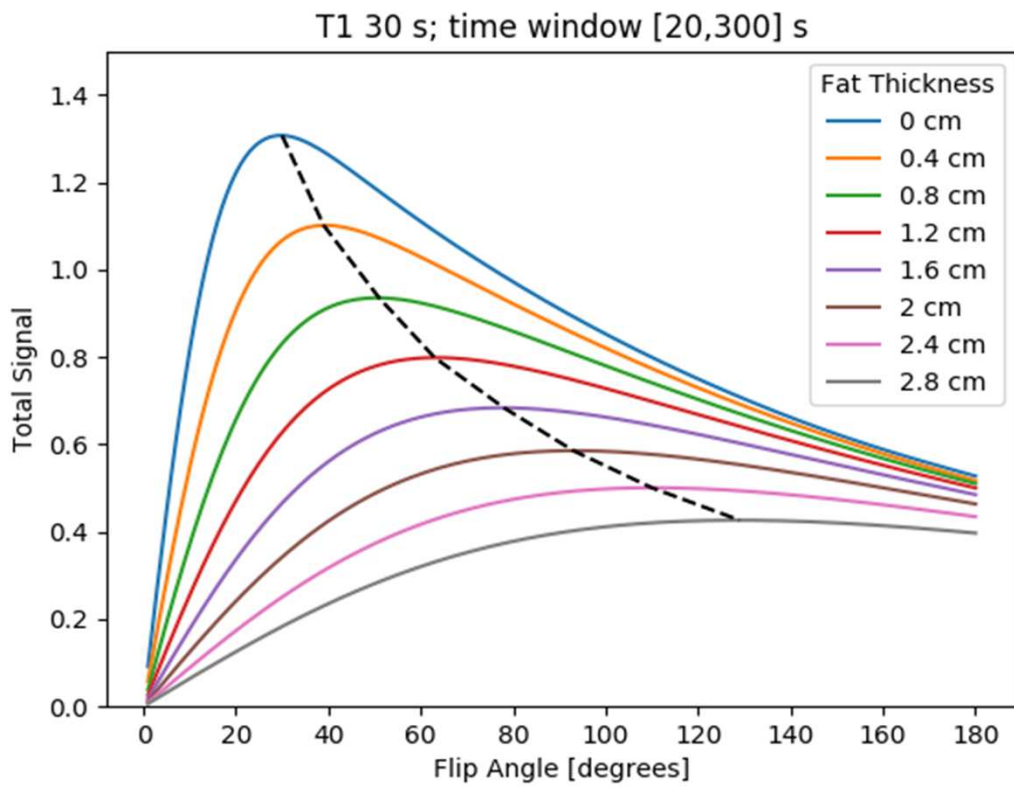

B

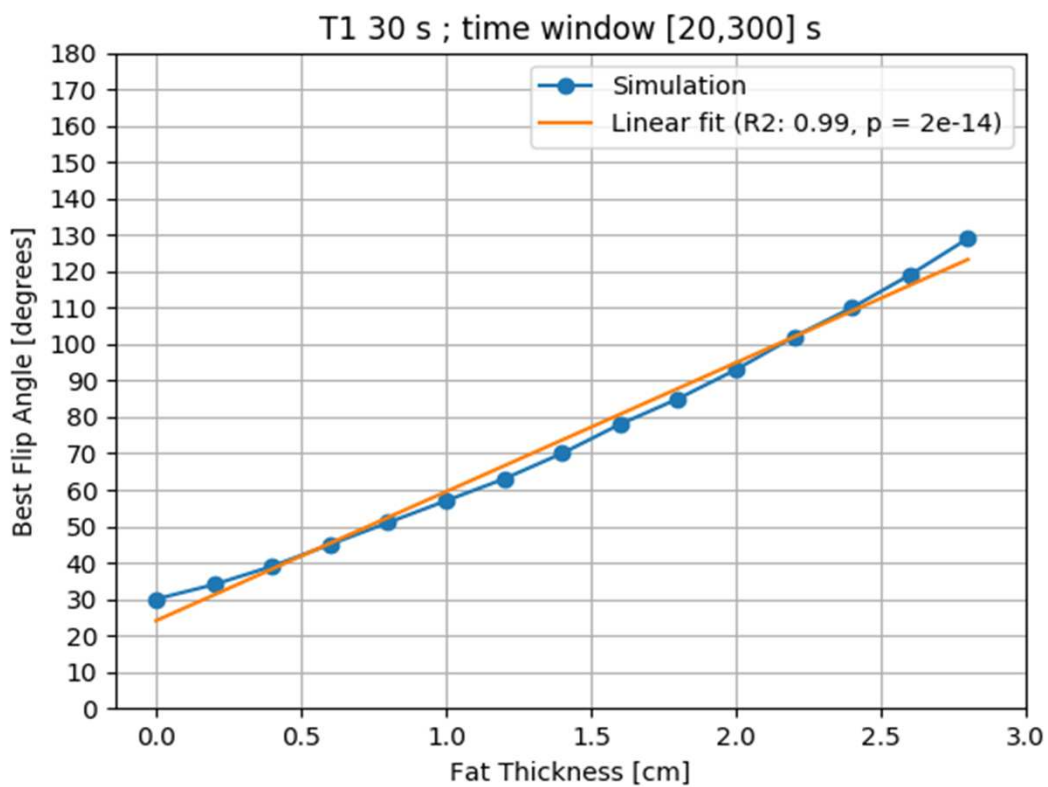

Supplementary Figure 5
